# Supplementary material for: Topological in vitro loading of the budding yeast cohesin ring onto DNA
Source: PubMed Central journal article supplement (PMC6205631; doi:10.26508/lsa.201800143), 2018-10-26

A

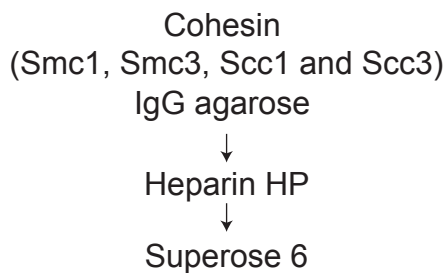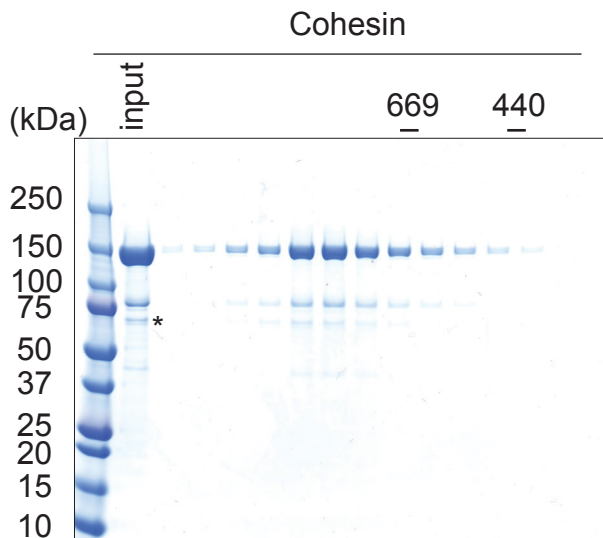

B

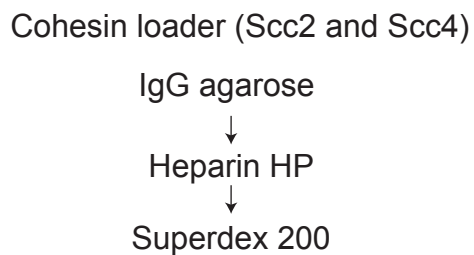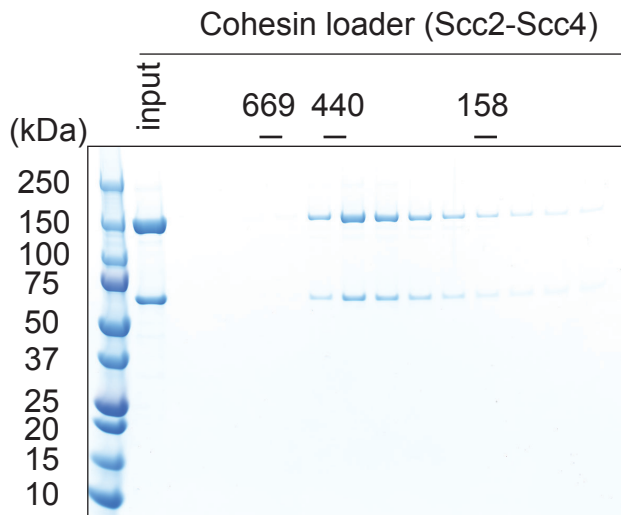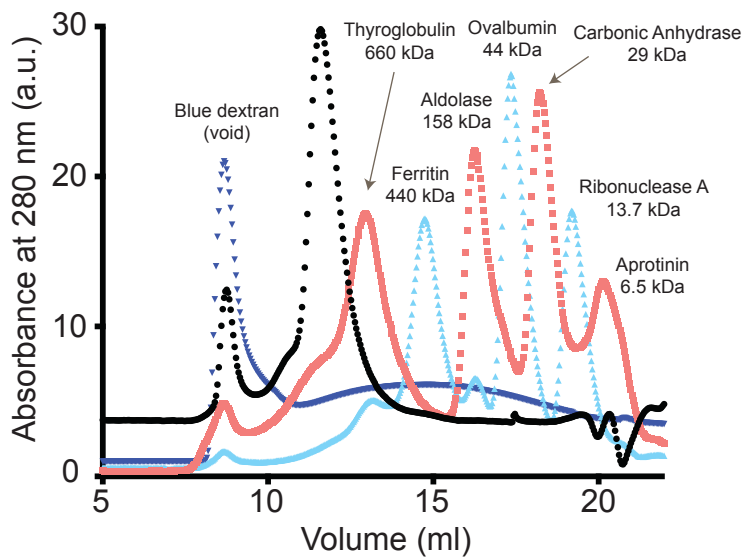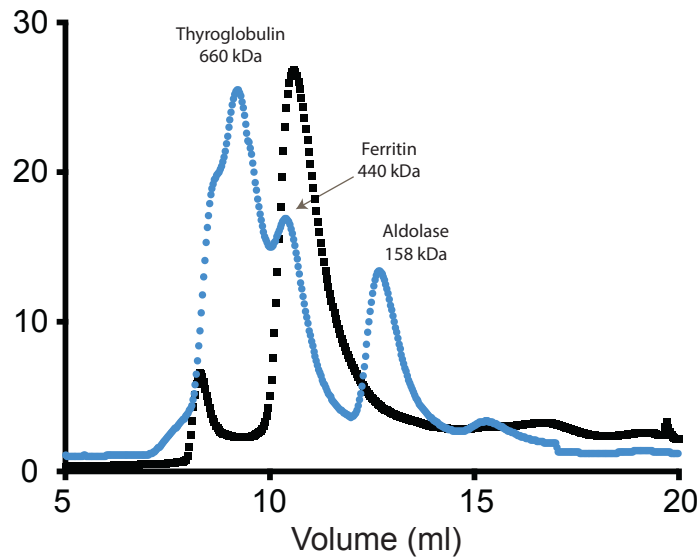

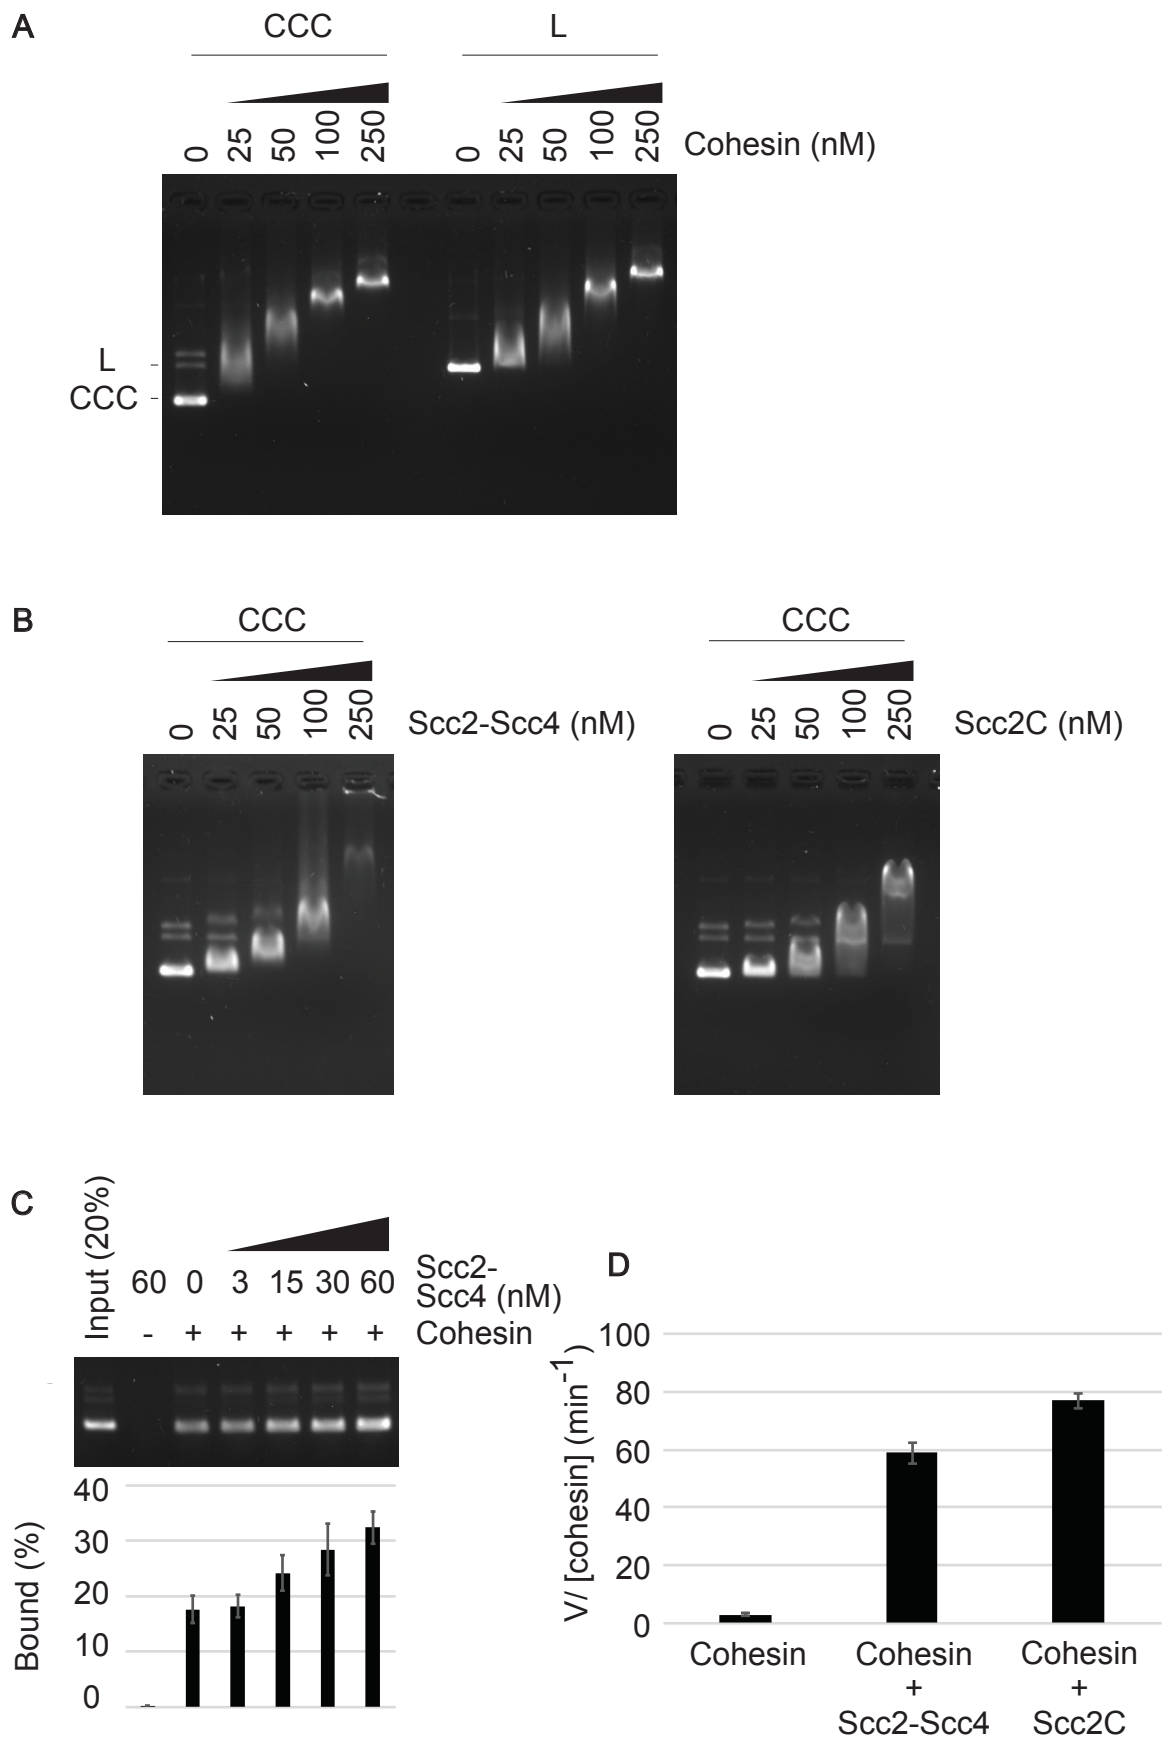

Figure S3

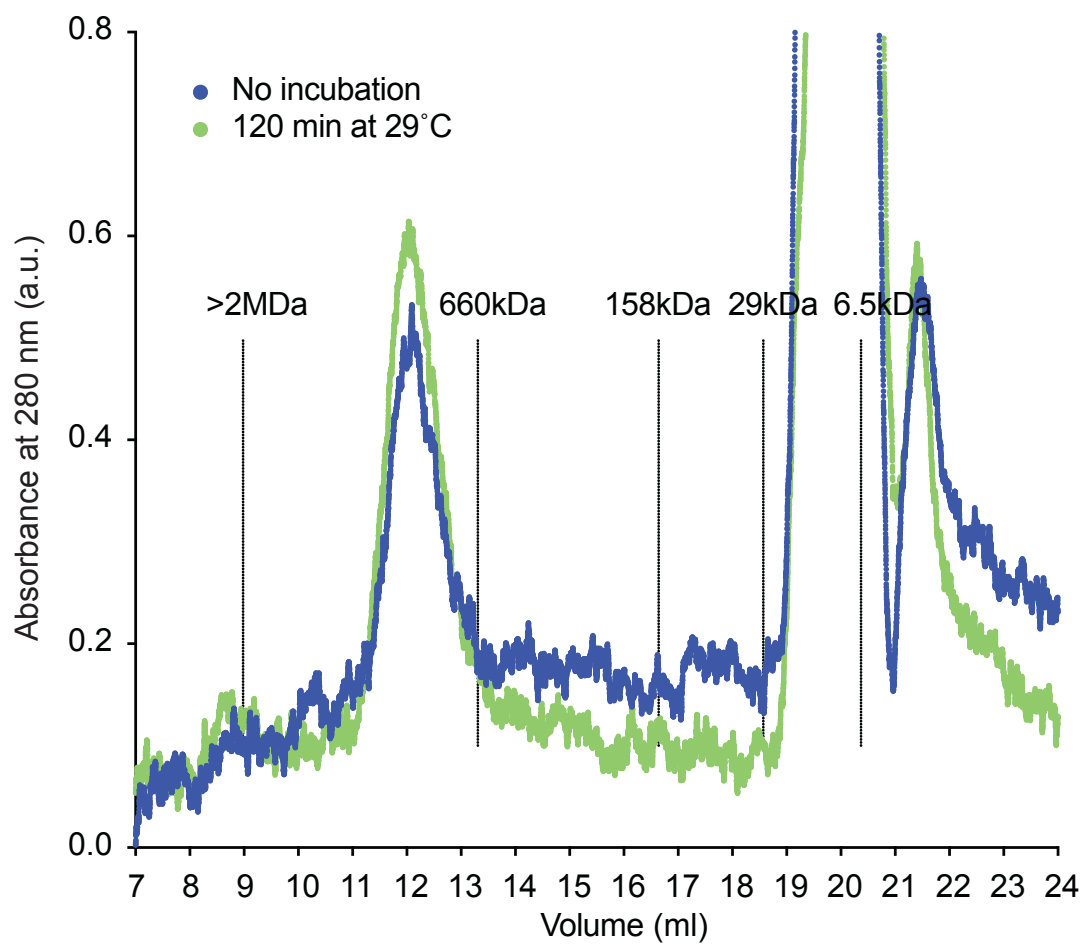

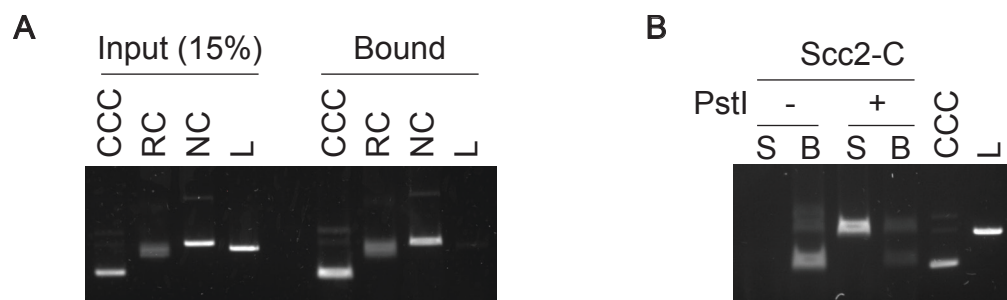

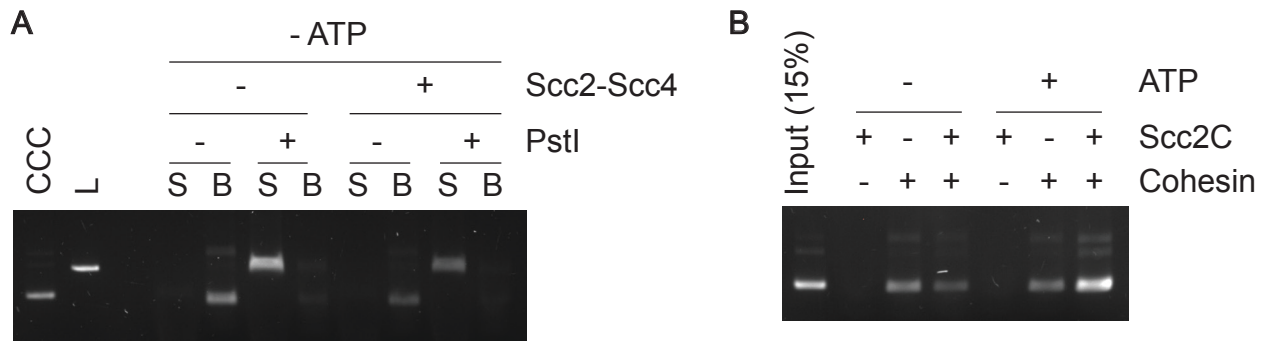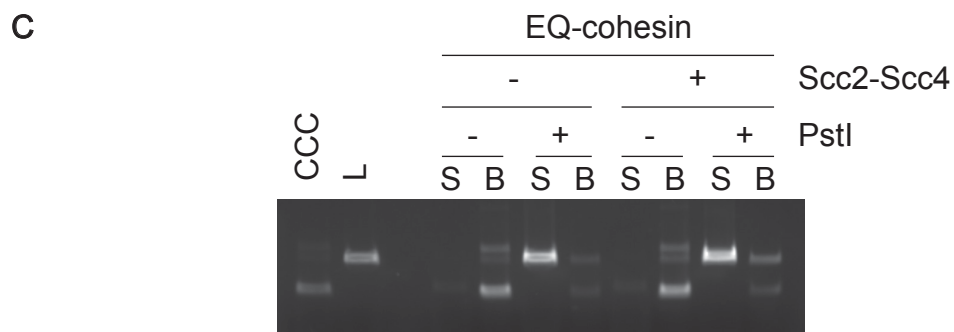

Supplement: NIHMS80079-supplement-Supplementary_Figures.pdf [file NIHMS80079-supplement-Supplementary_Figures.pdf]
